### 198 Immediate Post-Operative PDE5i Therapy Improves Early Erectile Function Outcomes after Robot-Assisted Radical Prostatectomy (RARP)

A. Nathan<sup>1,2</sup>, A. Rashid<sup>2</sup>, S. Shukla<sup>2</sup>, A. Sinha<sup>2</sup>, S. Sivathasan<sup>1</sup>, J. Rassam<sup>1</sup>, S. Smart<sup>1</sup>, K. Patel<sup>1</sup>, N. Shah<sup>1</sup>, B. Lamb<sup>1</sup>

<sup>1</sup>Addenbrooke's Hospital, Cambridge, United Kingdom, <sup>2</sup>University of Cambridge, Cambridge, United Kingdom

**Aim:** To assess whether the timing of post-operative Phosphodiesterase Inhibitor (PDE5i) therapy after Robot Assisted Radical Prostatectomy (RARP) is associated with a change in early erectile function, continence, or safety outcomes.

**Method:** Data was prospectively collected from a single surgeon in one tertiary centre and retrospectively evaluated. 158 patients were treated with PDE5i therapy post RARP over a two-year period.

**Results:** There were no significant differences in pre-operative characteristics between the therapy groups. Patients that had bilateral nerve sparing had a mean drop in Erectile Function (EF) score by 5.4 compared to 8.8 in the unilateral group. Additionally, 34.9% of bilateral nerve sparing patients returned to baseline compared to 12.1% of unilateral. Drop in EF scores and percentage return to baseline for unilateral nerve sparing was respectively 9 and 11.1% of immediate (day 1-2), 7 and 14.8% of early (day 3-14) and 9.7 and 9.5% of late (day >14) therapy ( $p=0.9$  and  $p=0.6$ ). For bilateral nerve sparing this was respectively 3.5 and 42.9% immediate therapy, 5.5 and 35.5% early therapy and 7.3 and 25% late therapy ( $p=0.017$  and  $p=0.045$ ). Pad free and social continence was achieved in 54% and 37% of those receiving immediate therapy, 60% and 33% for early therapy and 26% and 54% for late therapy. There were no differences in compliance, complication, or readmission outcomes.

**Conclusions:** Immediate PDE5i therapy should be considered in patients following nerve sparing RARP in order to maximise functional outcomes, especially in those undergoing bilateral nerve spare.
